# Supplementary material for: The cocktail method: influence of microbubble shell homogeneity on acoustic behavior and stability
Source: Royal Society of Chemistry journal article supplement (doi:10.1039/d6sm00286b), 2026-06-11
Supplement: d6sm00286b1.pdf [file d6sm00286b1.pdf]

## Supplementary Information

### The Cocktail Method: Influence of Microbubble Shell Homogeneity on Acoustic Behavior and Stability

Pascal Poc<sup>1</sup>, Giulia Guerriero<sup>2</sup>, Johannes Büchler<sup>1</sup>, Tim Grossrieder<sup>1</sup>, Marco Cattaneo<sup>2</sup>, Gonzalo Collado-Lara<sup>2</sup>, Nathan Blanken<sup>1</sup>, Ines Oberhuber<sup>1</sup>, Justine Kusch<sup>3</sup>, Outi Supponen<sup>2</sup>, Simone Schuerle<sup>1,\*</sup>

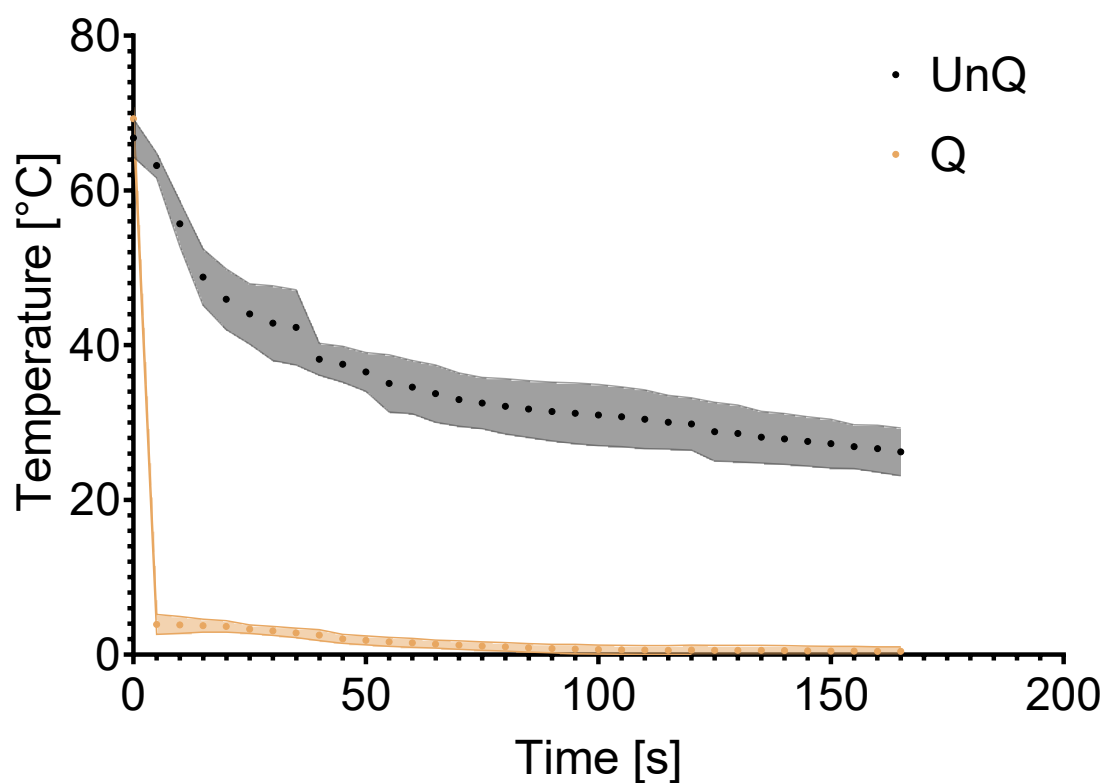

Figure S 1 Temperature gradient of standard cooling procedure (UnQ) versus cooling gradient of the cocktail method (Q).

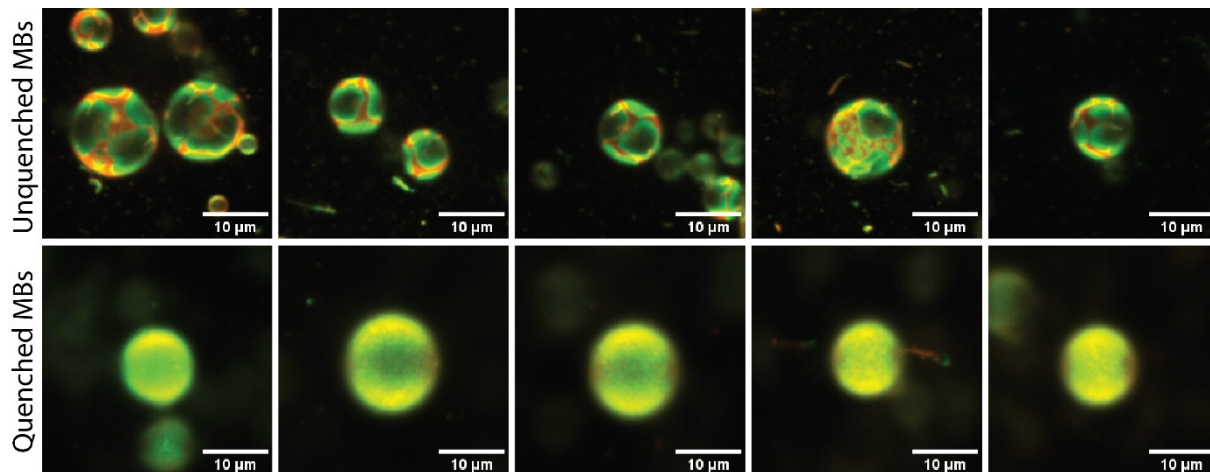

**Figure S 2 Representative images of Unquenched and Quenched MBs for co-localization analysis.**

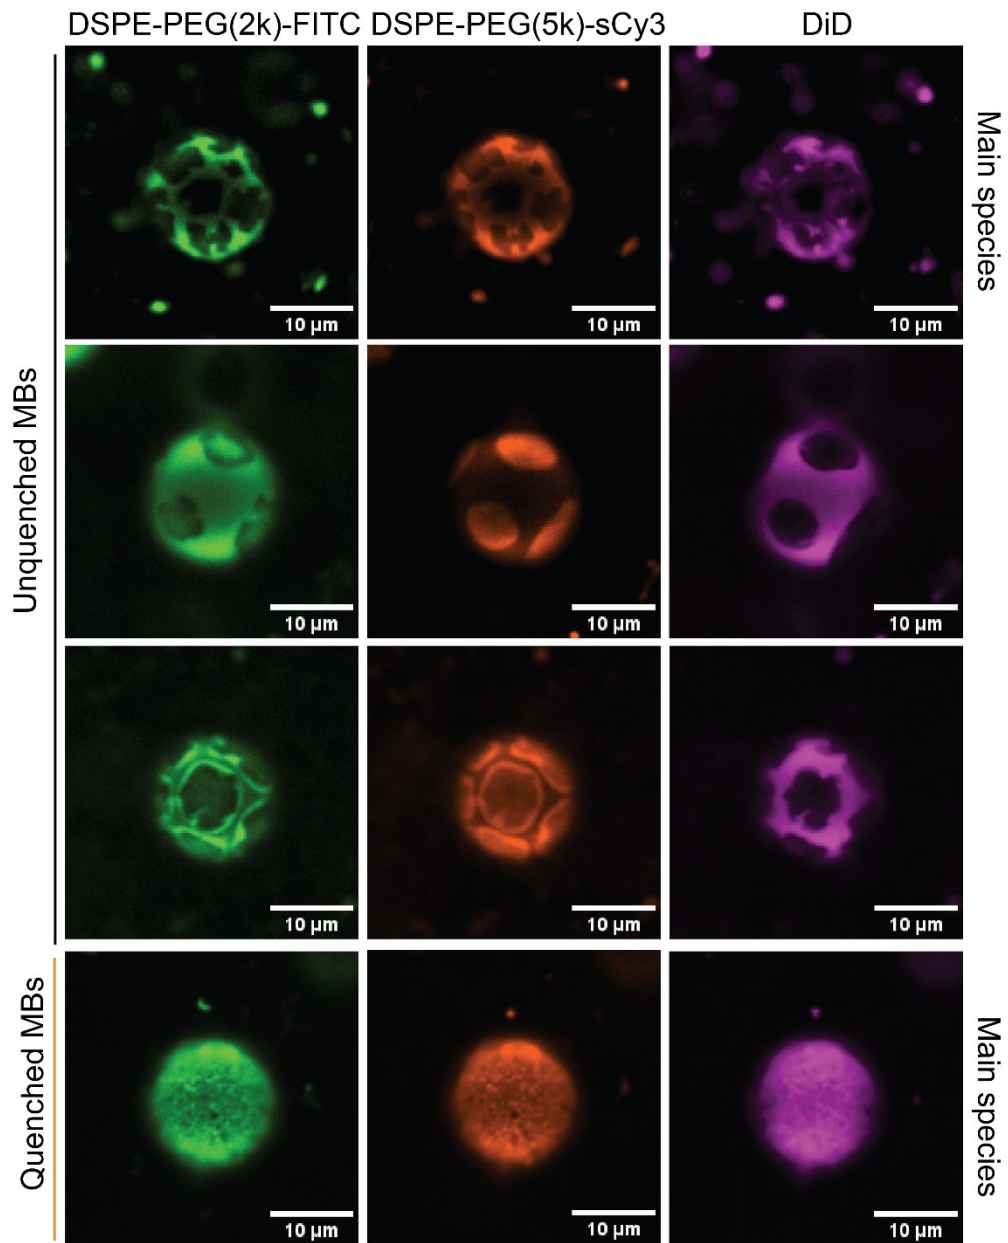

**Figure S 3 Multi color co-localization of different emulsifier lipids DSPE-PEG2000-FITC and DSPE-PEG5000-sCy3 and membrane probe DiD.** Three different types of lipid unmixing patterns could be detected for Unquenched MBs, while having one preferred species versus a single, seemingly homogenous species for the quenched MBs.

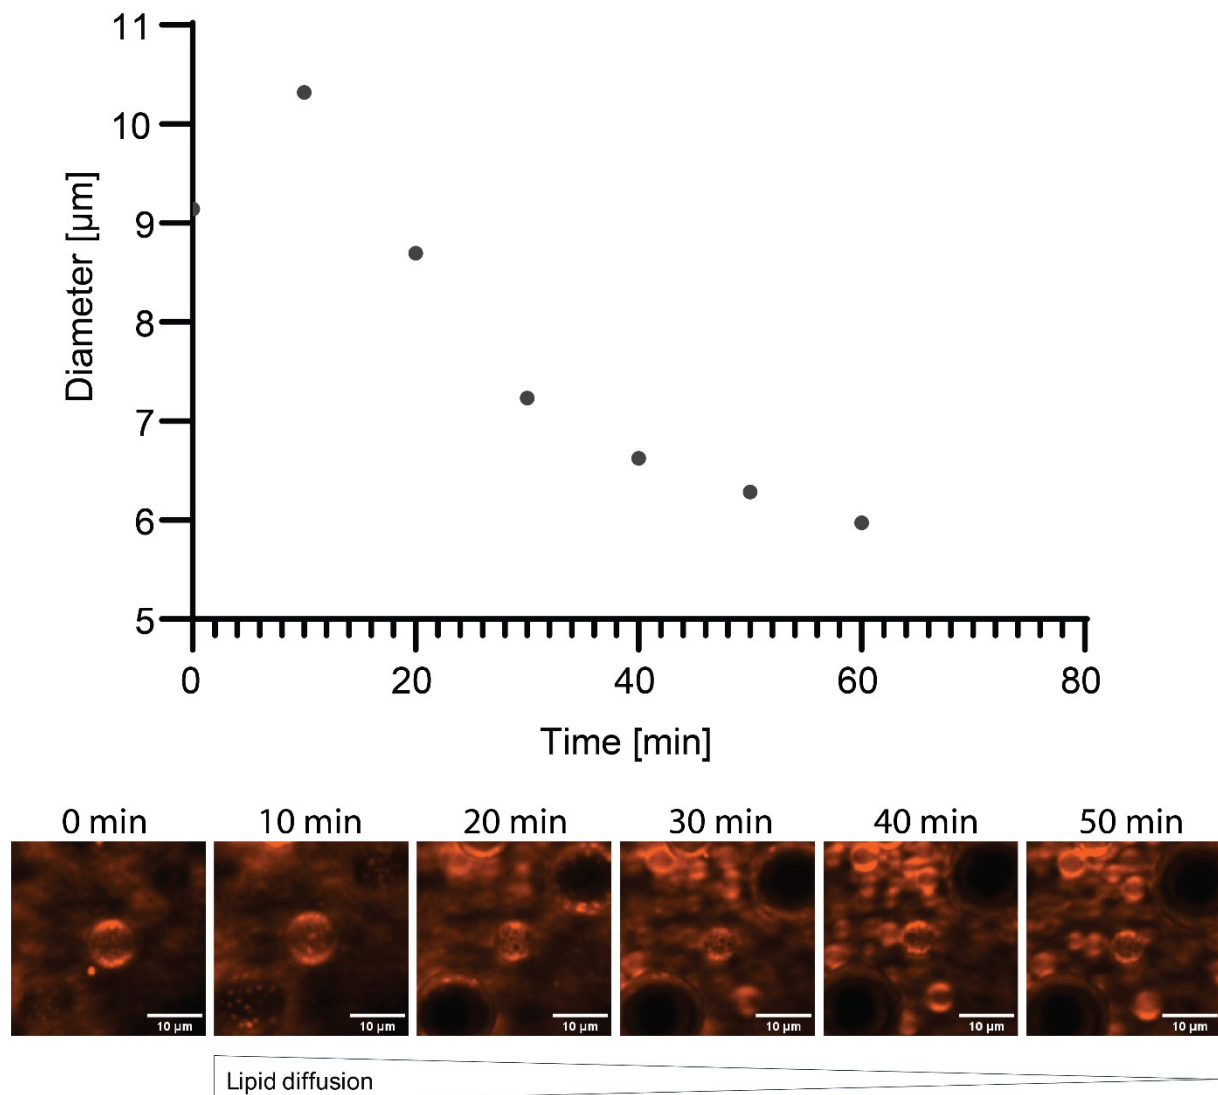

**Figure S 4 Tracking of MB radius during stabilization.** A single MB was recorded over the period of 60 minutes to follow the correlation between radial decrease and visual decrease of lipid diffusion.

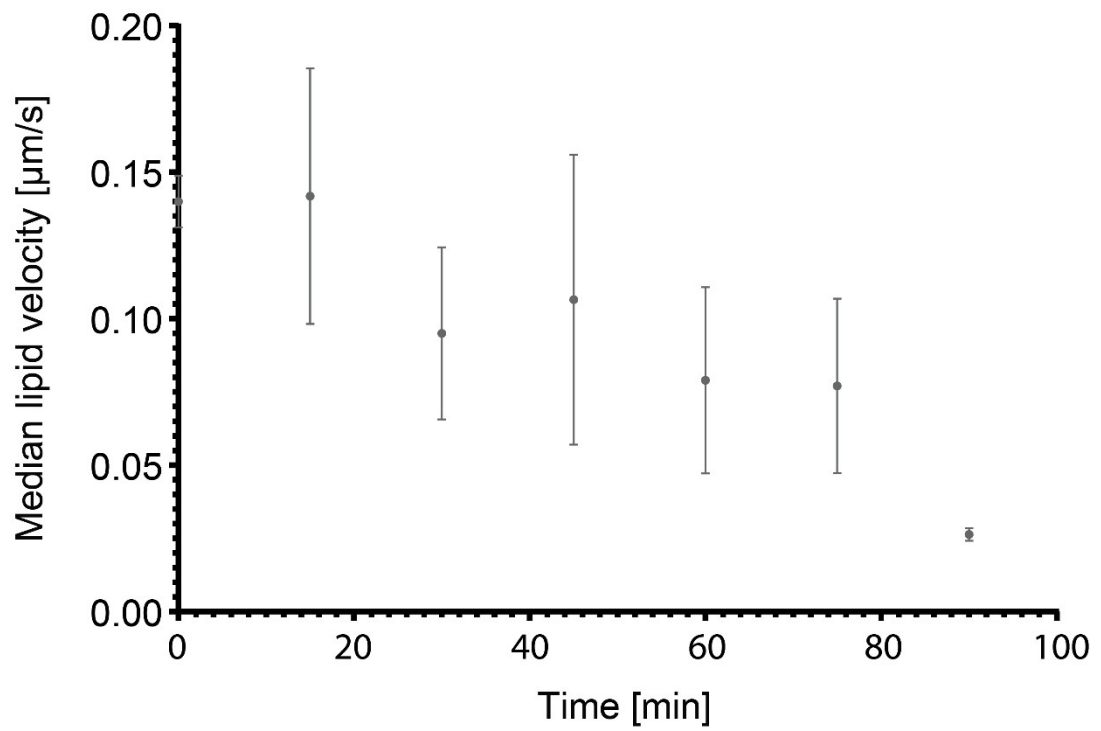

**Figure S 5 Tracking of lipid diffusion velocity during MB stabilization.** After production of MBs using the cocktail method, every 15 minutes a sample of the batch was taken and the surface structures of multiple MBs were recorded using confocal microscopy. Using a MB detection algorithm and Farnebeck's optical flow algorithm, the diffusion speed of the lipids was determined.

Dil

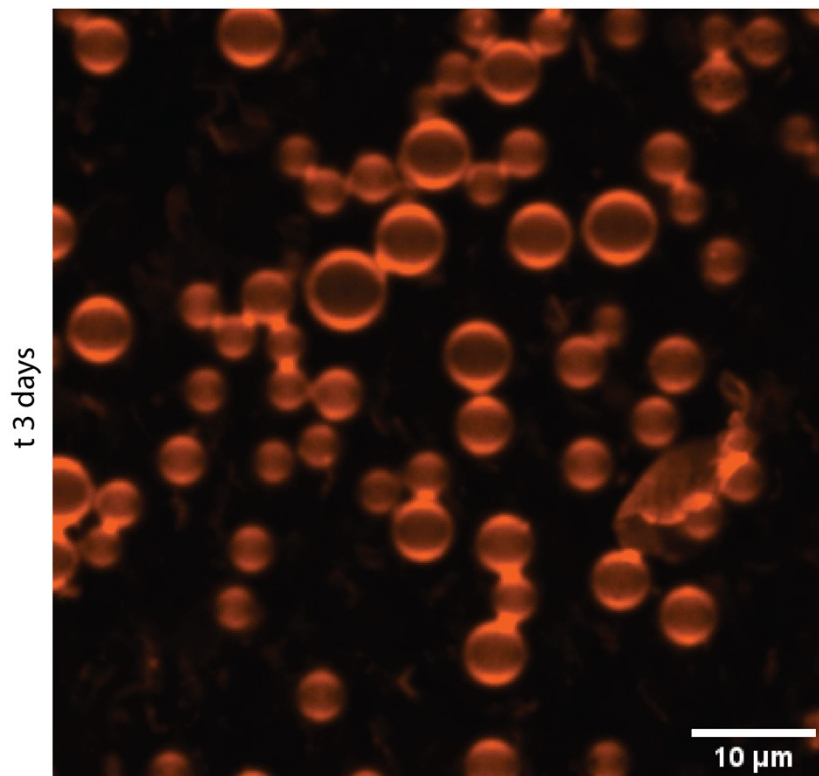

**Figure S 6 Confocal image of a quenched microbubble population after 3 days of storage, visualized using the membrane probe Dil.**

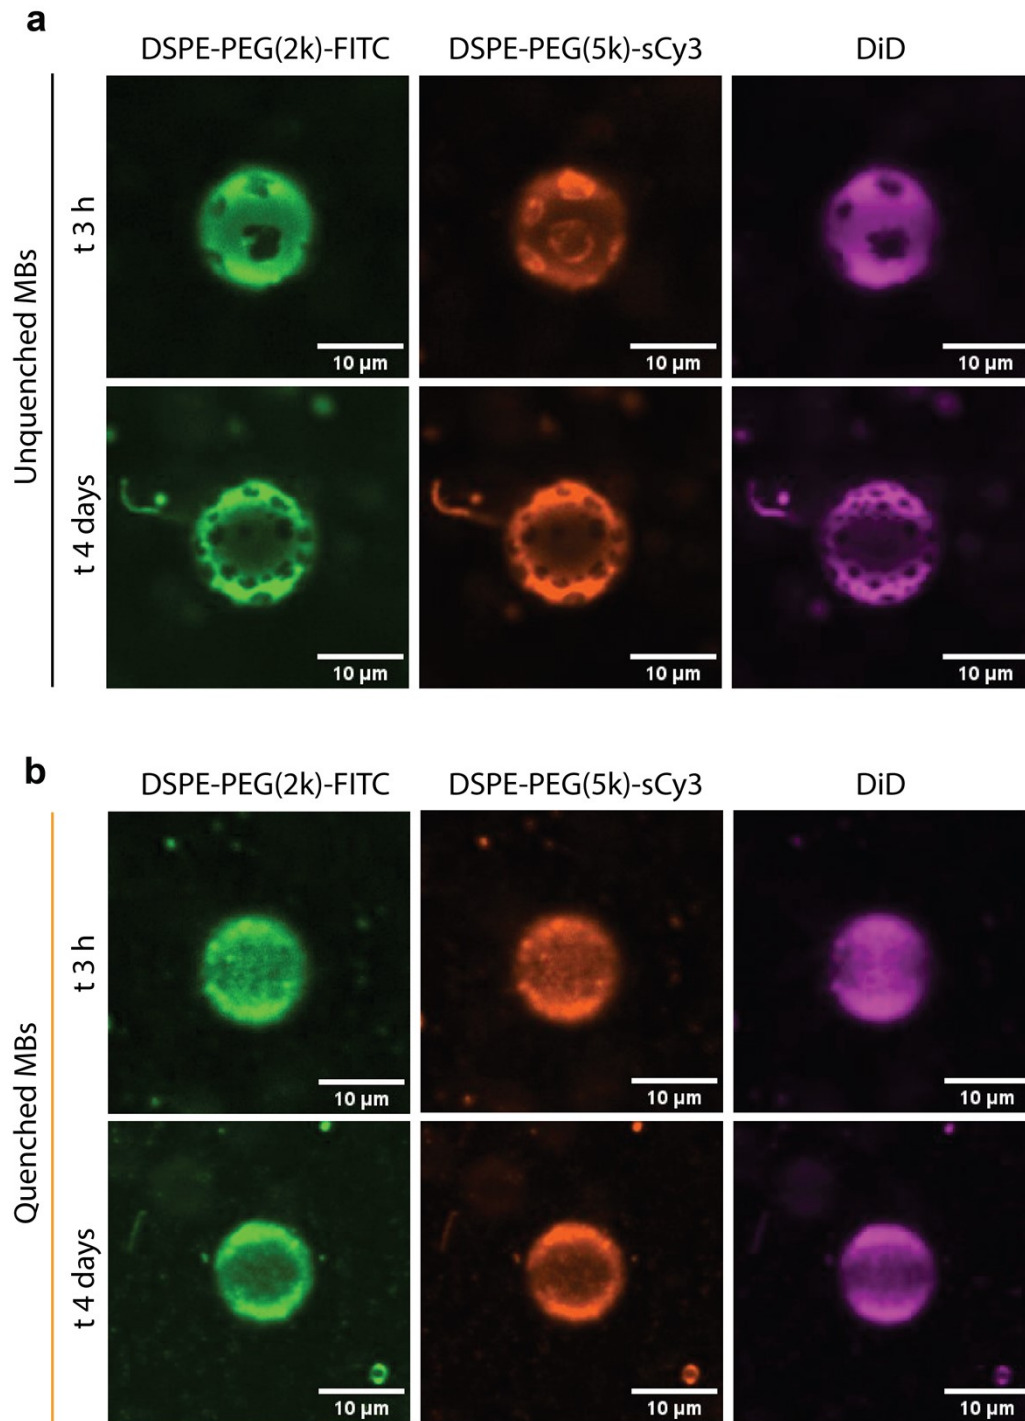

**Figure S 7 Representative images comparing quenched and unquenched MB batches at 3 hours versus 4 days post-production.** Images were performed using labeled emulsifiers DSPE-PEG(2k)-FITC, DSPE-PEG(5k)-sCy3 and membrane probe DiD (note: these are population-representative, not the identical MBs)

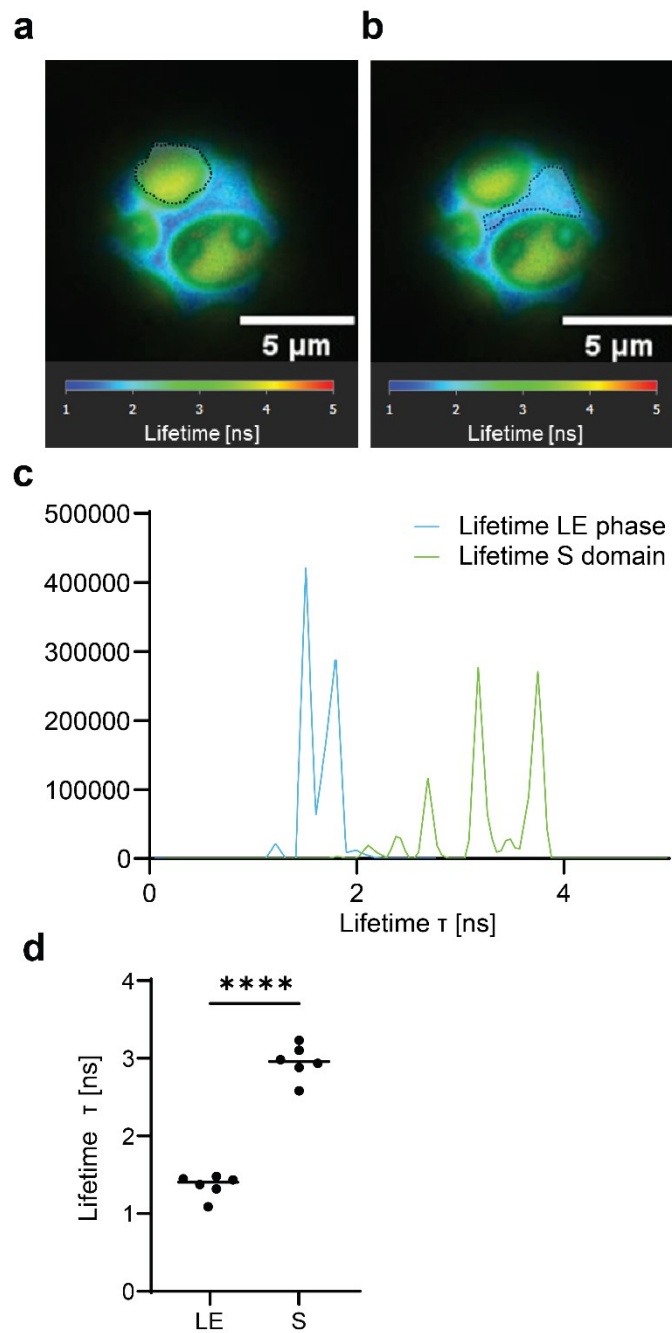

**Figure S 8 Lifetime comparison between surface domains.** Representative images of defined regions of interest (ROI) for (a) S phase and (b)  $L_E$  phase in unquenched MBs. (c) Lifetime Histogram corresponding to defined ROIs in (a) and (b). (d) Mean lifetime of  $L_E$  versus S domain.

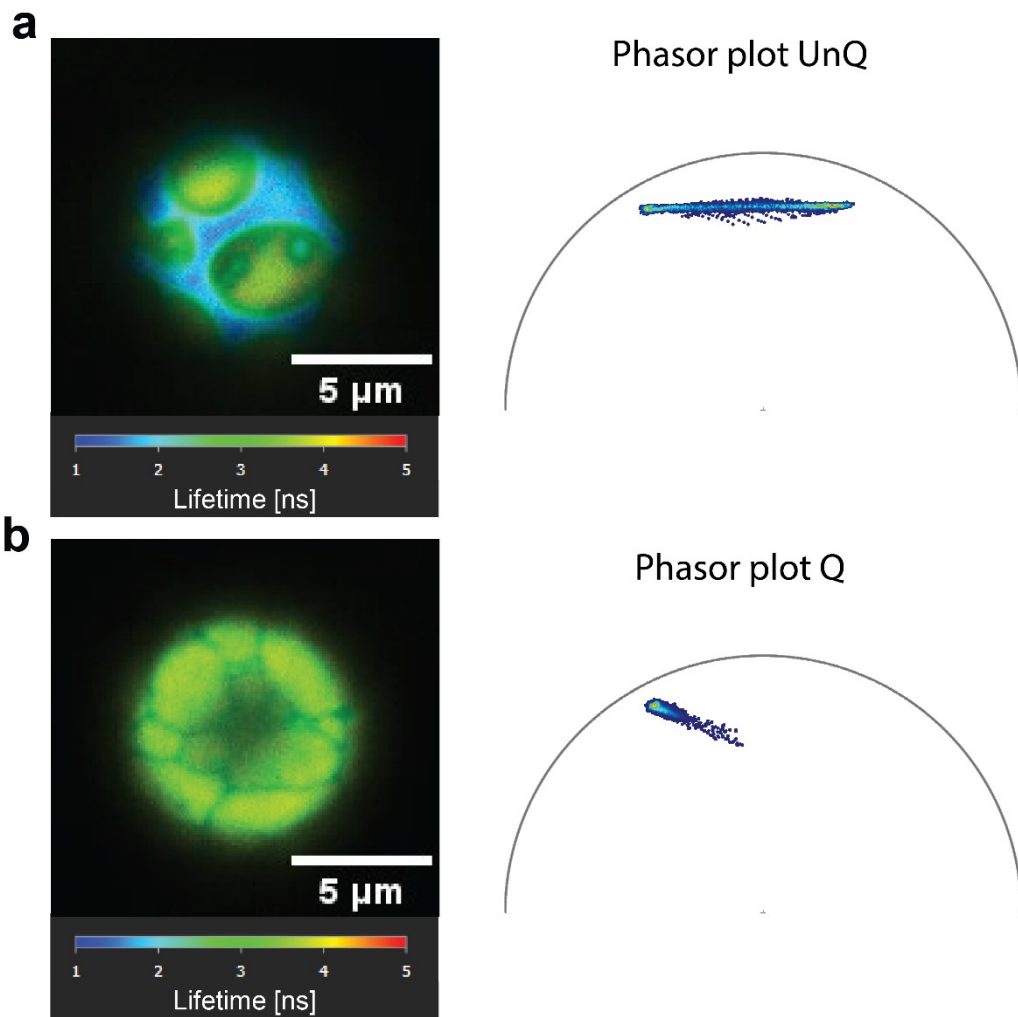

**Figure S 9 FLIM phasor plot of an unquenched and quenched MB.** Spatial pixels are transformed into a two-dimensional phasor plot based on their respective fluorescence decay profiles. The coordinates within this plot represent the average lifetime and decay multiplicity; longer lifetimes are positioned toward the left, while shorter lifetimes shift to the right. Proximity to the universal semicircle indicates a mono-exponential (uniform) decay transition.

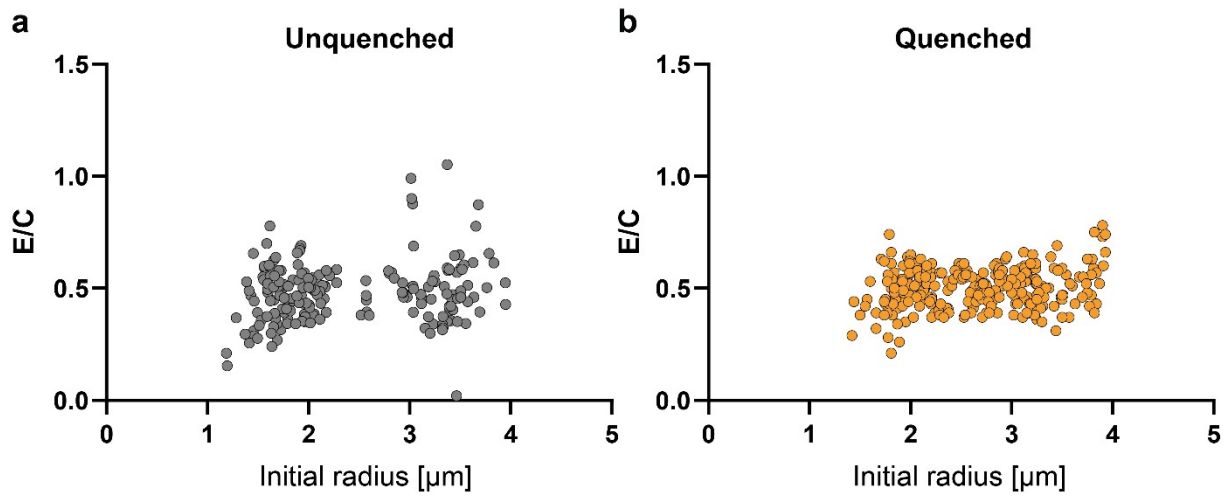

**Figure S 10 E/C ratios of Unquenched versus Quenched MBs as a function of their initial radius**

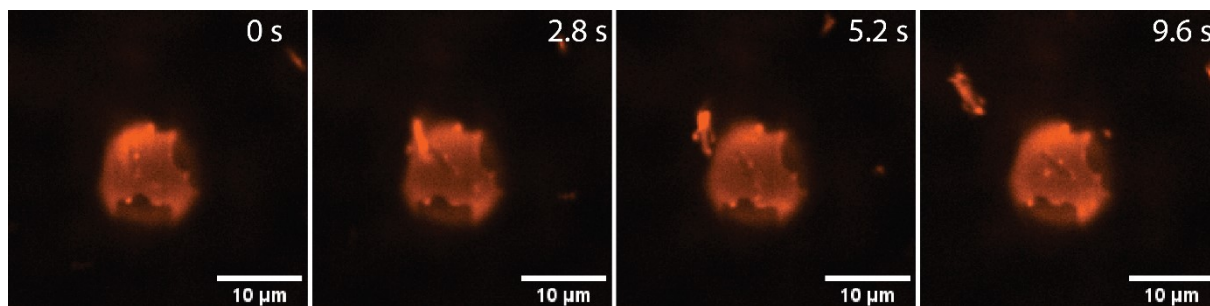

**Figure S 11 Time series of lipid loss in LE phase during stabilization process.**

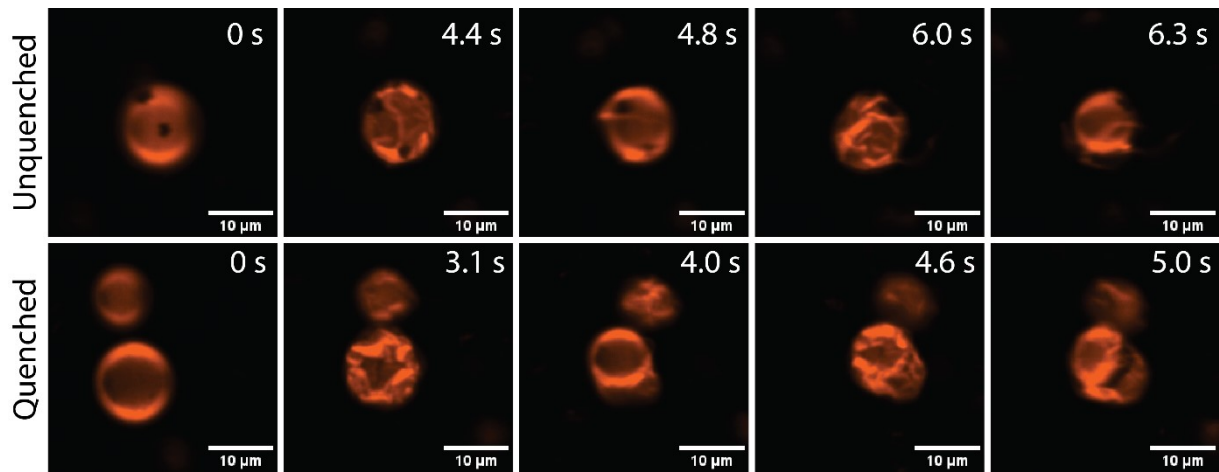

**Figure S 12 Compression time series of Unquenched and Quenched MBs.** Both MBs show similar wrinkling to smooth transitions, while wrinkling happening mainly in the LE phase.
